# Supplementary material
Source: MDPI journal article supplement (https://www.mdpi.com/2673-4591/6/1/79)
Supplement: s1 [file s1]

# Wearable XAI: a knowledge-based federated learning framework

Sara Nasiri<sup>1,2,\*</sup>, Iman Nasiri<sup>1</sup> and Kristof Van Laerhoven<sup>2</sup>

<sup>1</sup> SmartyX GmbH - Node 4.0, Martinshardt 19, 57074 Siegen, Germany; iman@node-4.com

<sup>2</sup> Department of Electrical Engineering & Computer Science, University of Siegen, Germany; kvl@eti.uni-siegen.de

\*Correspondence: sara.nasiri@uni-siegen.de

## Abstract

Federated learning is a knowledge transmission and training process that occurring in turn between user models at edge devices and the training model at the central server. Due to privacy policies, concerns and heterogeneous data, this is a widespread requirement in federated learning applications. In this work, we use knowledge-based methods and in particular case-based reasoning (CBR) to develop a wearable explainable artificial intelligence (XAI) framework. CBR is a problem-solving AI approach for knowledge representation and manipulation which considers successful solutions of past conditions that are likely to serve as candidate solutions for a requested problem. It enables federated learning when each user owns not only his/her private data, but also uniquely designed cases. New generated cases can be compared to the knowledge base and the recommendations enable the user to communicate better with the whole system. It improves users' task performance and increases user acceptability while they need explanations to understand why and how AI algorithms arrive at these solutions which is the best decision.

**Keywords:** explainable artificial intelligence; wearable AI; mobile edge computing; case-based reasoning; transparency; acceptability

## Knowledge-based Federated Learning

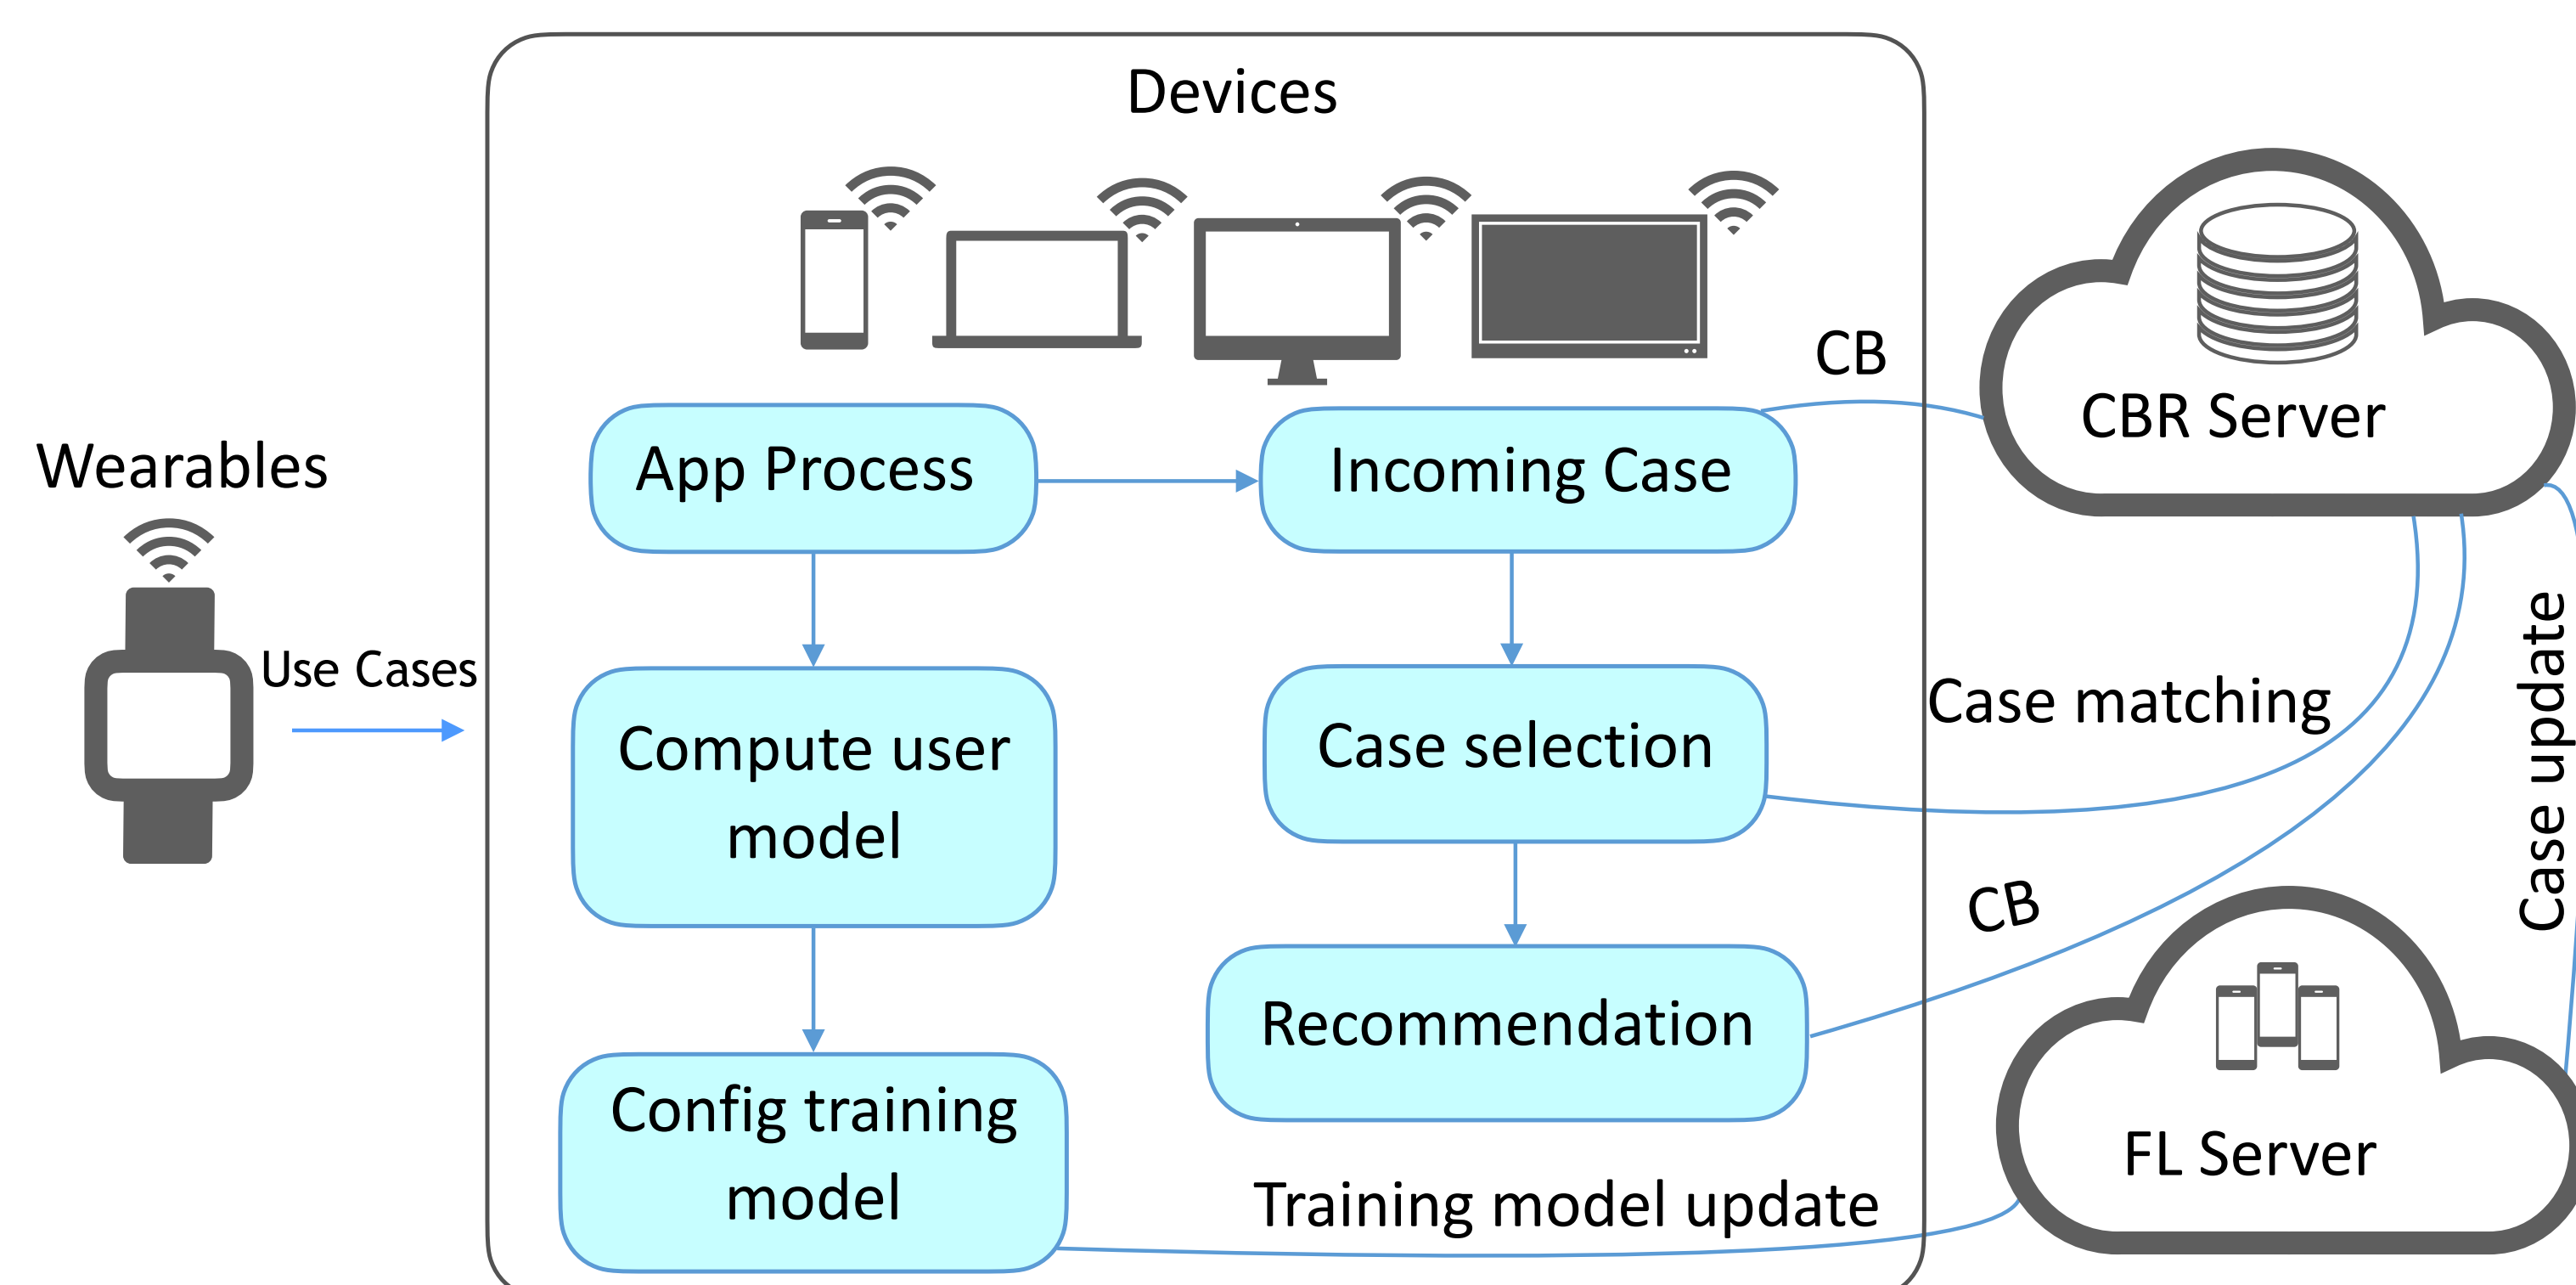

An overview of CBR-federated learning (FL) as a wearable XAI framework.

## Conclusion

As a result, although some works looked into the plausibility of actualising on-device machine learning models and changing existing algorithms to fit into the asset obliged gadgets, CBR-FL allows for smarter models, higher acceptability, lower latency, less power consumption and with the higher level of usability, all while ensuring privacy. Explainable AI enabled wearables which we called wearable XAI, are not designed to track the information, but moreover characterises what the client must do and how they ought to perform and to progress their tasks among other bits of knowledge.

## Wearable Usability and Acceptability

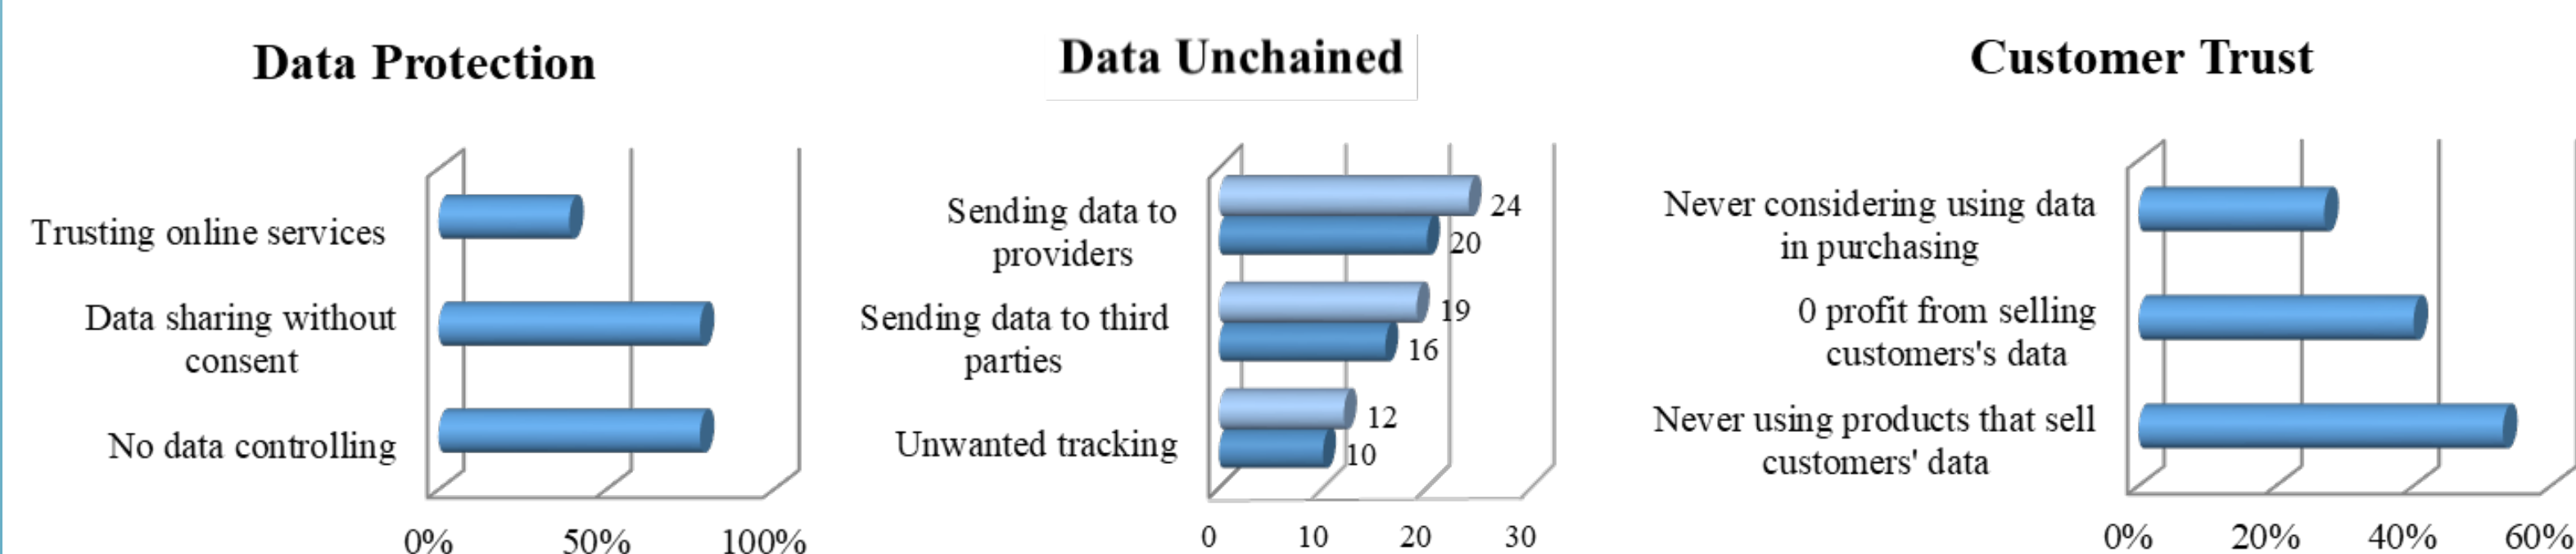

Data protection and data unchained, data adopted from [1, 2]; and Customer trust, which is a consumer pulsing survey in the US, UK, China and Brazil, adopted from [3].

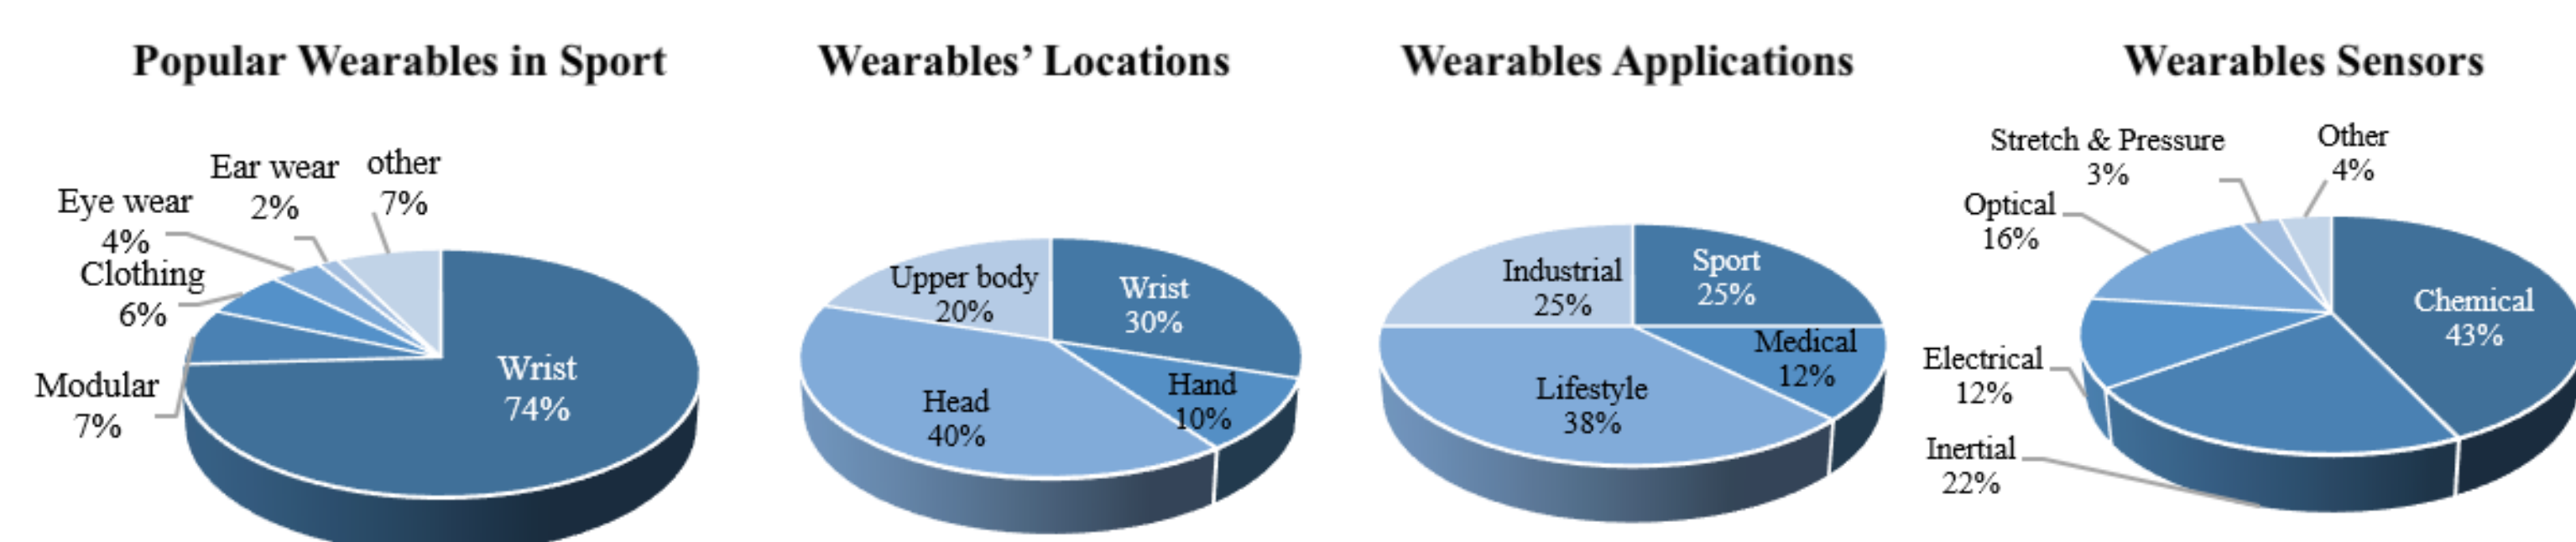

A wearable's position, application and type, data adopted from [4, 5].

## References

1. "Wearables, fitness apps, and data protection" survey (08-09/2016), mindline media GmbH, Verbraucherzentrale NRW e.V. Mintropstr. 27, 40215 Düsseldorf.
2. "Wearables, fitness apps, and data protection" survey (08-09/2016), mindline media GmbH and survey (07-08/2016), datenschutz nord GmbH, Verbraucherzentrale NRW e.V. Mintropstr. 27, 40215 Düsseldorf.
3. 2020 Global Marketing Trends - Deloitte, 2019.
4. G. Aroganam, N. Manivannan, and D. Harrison, Review on Wearable Technology Sensors Used in Consumer Sport Applications, Sensors, vol. 19, no. 1983, pp. 1–26, 2019.
5. J. Heikenfeld, J. Rogers, T. Pan, M. Khine, and J. Wang, Wearable sensors: modalities, challenges, and prospects, R. Soc. Chem., vol. 18, no. 2, pp. 217–248, 2018.

## Acknowledgement

This work is supported in part by the Exist-GS program for the research project "Node 4.0" (Exist-GS 03EGSNW668) which has been funded by the Federal Ministry of Economics and Energy (BMWi) and the European Social Fund (ESF).

Gefördert durch:

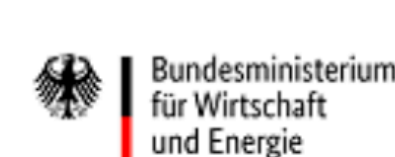

aufgrund eines Beschlusses des Deutschen Bundestages

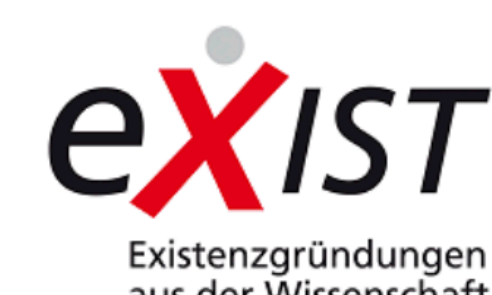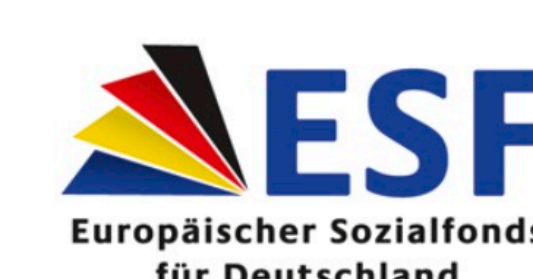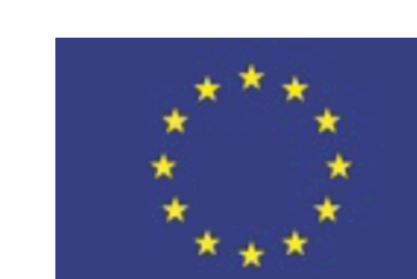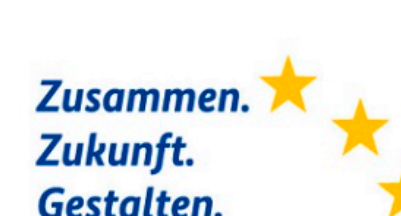

Europäische Union
